# Supplementary material for: Dual-Functional Peroxidase-Copper Phosphate Hybrid Nanoflowers for Sensitive Detection of Biological Thiols
Source: MDPI journal article supplement (doi:10.3390/ijms23010366), 2021-12-29
Supplement: s1 [file s1]

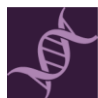

## Supplementary Materials

# Dual-Functional Peroxidase-Copper Phosphate Hybrid Nanoflowers for Sensitive Detection of Biological Thiols

Xuan Ai Le<sup>†</sup>, Thao Nguyen Le<sup>†</sup> and Moon Il Kim\*

Department of BioNano Technology, Gachon University, 1342 Seongnamdae-ro, Sujeong-gu, Seongnam 13120, Gyeonggi, Republic of Korea; xuanai.le6667@gmail.com (X.A.L.); thaonguyen65949@gmail.com (T.N.L)

\* Correspondence: moonil@gachon.ac.kr (M.I.K); Tel.: +82-31-750-8563

<sup>†</sup> These authors contributed equally to this work.

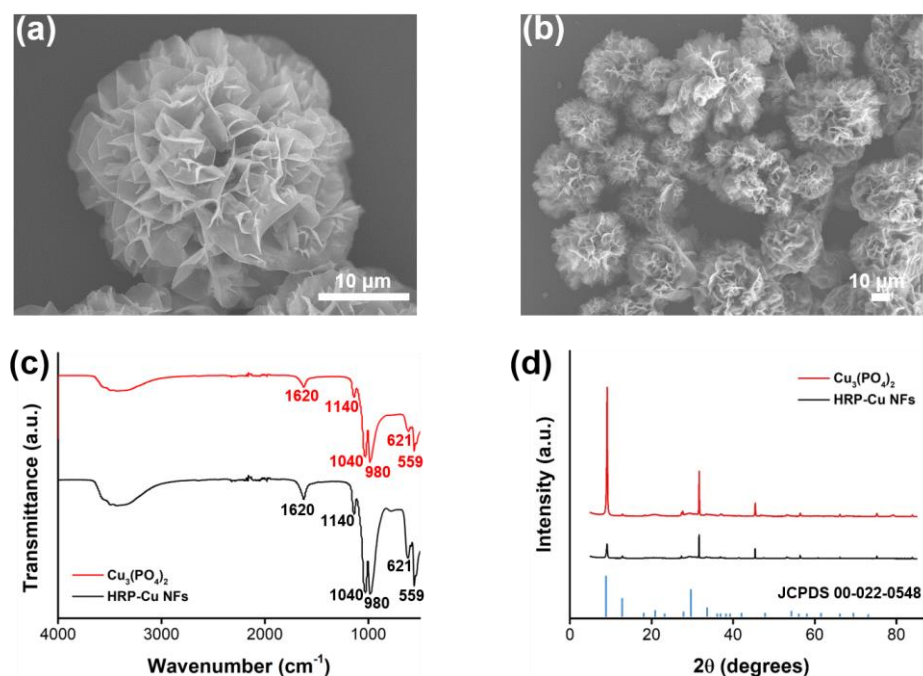

**Figure S1.** SEM images with a) high magnification and b) low magnification, c) FT-IR spectra, and d) XRD patterns of HRP-Cu NFs.

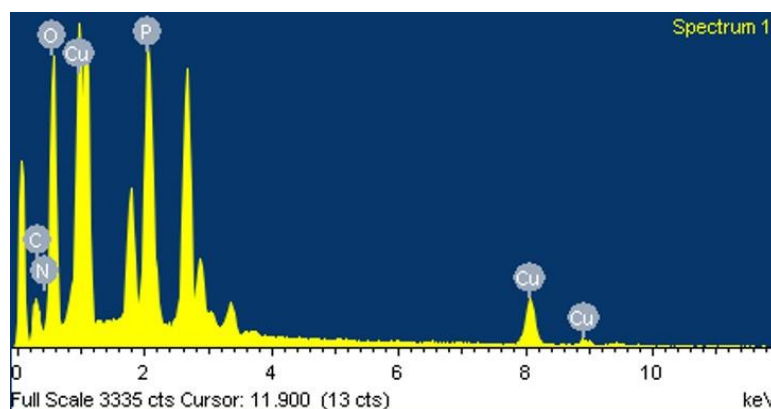

**Figure S2.** EDS analysis of HRP-Cu NFs.

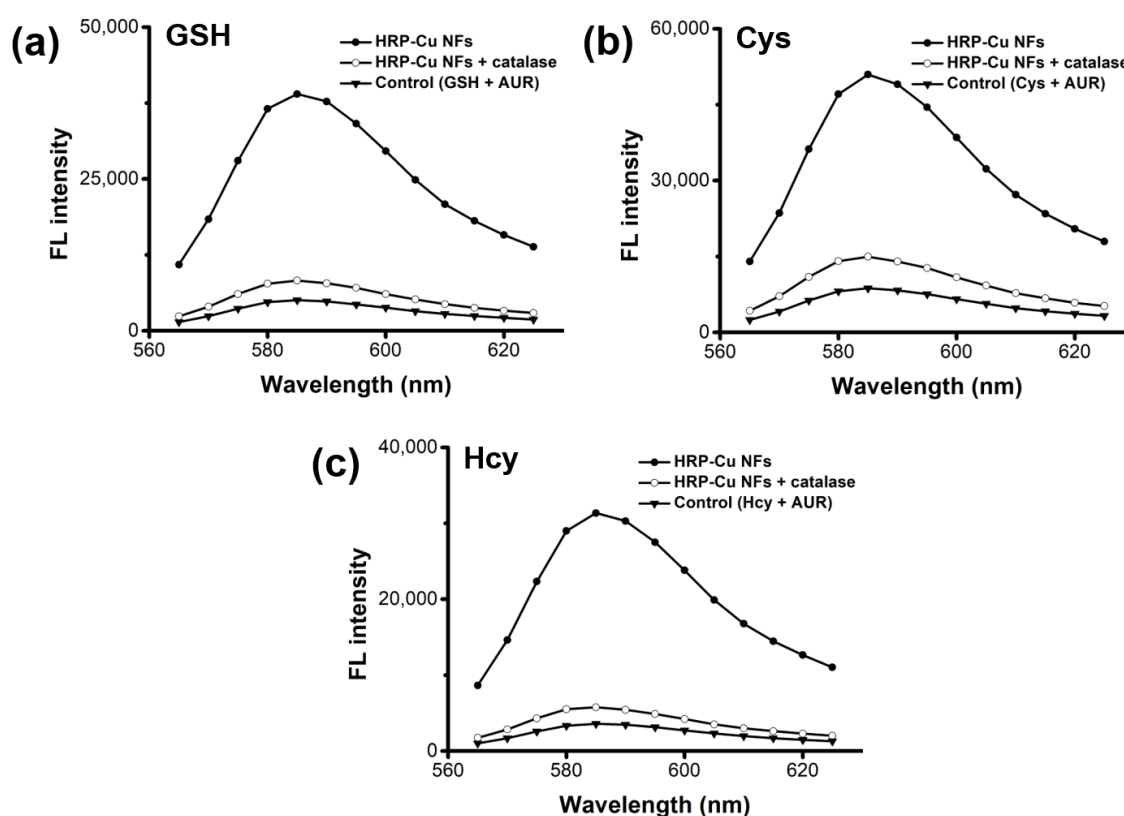

**Figure S3.** Demonstration for  $\text{H}_2\text{O}_2$  generation from HRP-Cu NFs-mediated biothiol oxidation via the addition of catalase.

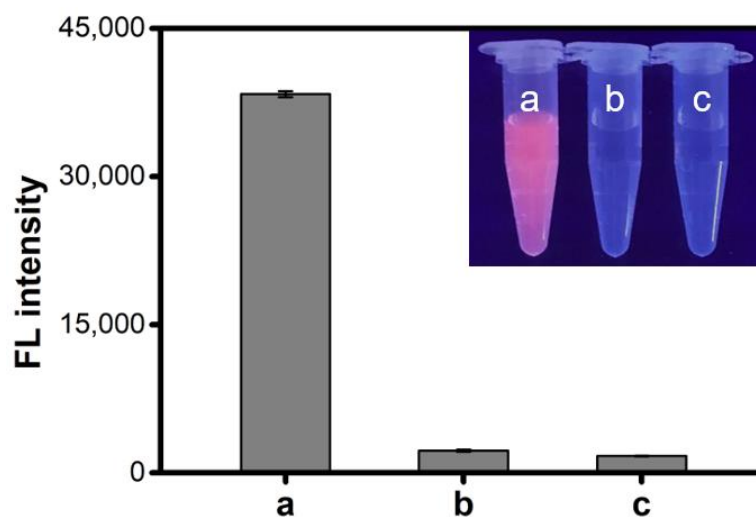

**Figure S4.** Fluorescence intensities from AUR oxidation in the presence of GSH catalyzed by a) HRP-Cu NFs, b) supernatant solution separated from HRP-Cu NFs, and c) negative control. The supernatant solution was collected by first incubating HRP-Cu NFs (1 mg/mL) in sodium phosphate buffer (800  $\mu\text{L}$ , 10 mM, pH 7.4) for 15 min, followed by centrifugation (10,000 rpm, 1 min).

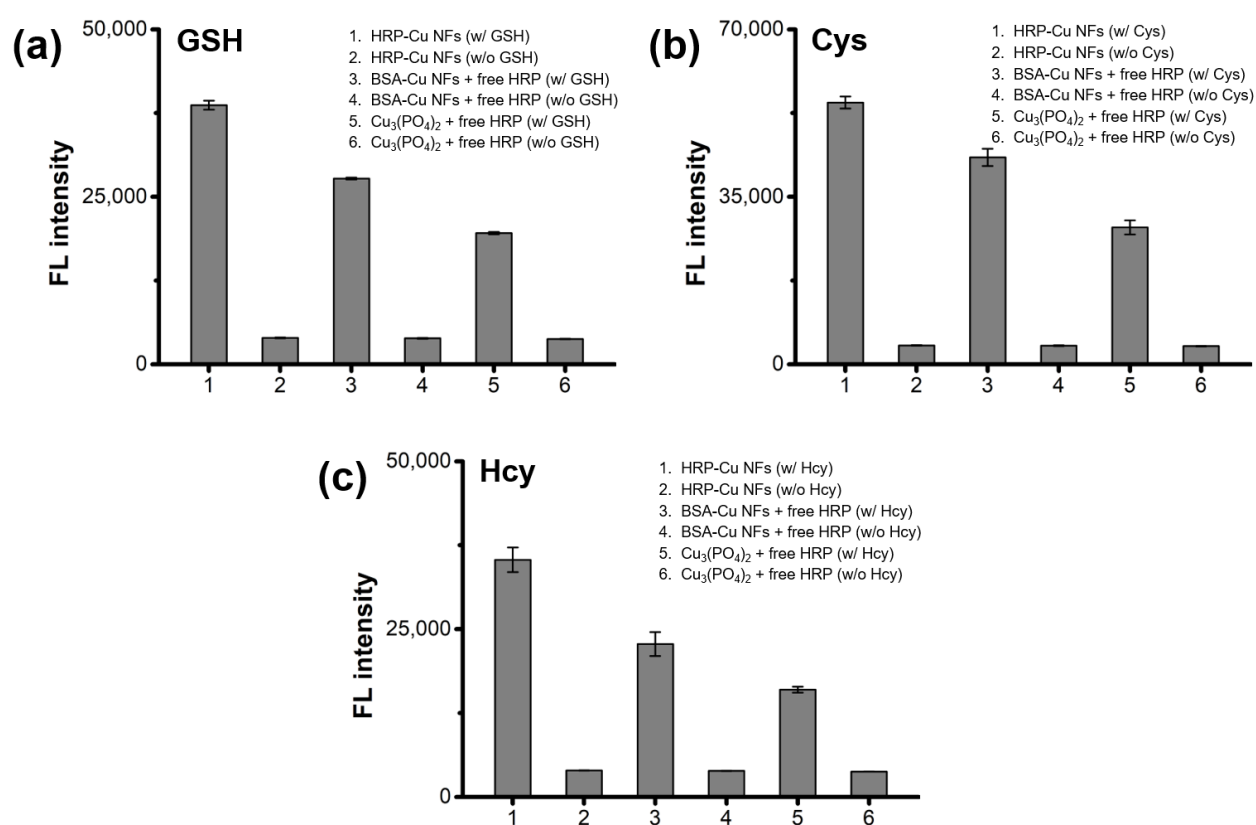

**Figure S5.** Fluorescence intensities from AUR oxidation promoted by HRP-Cu NFs, BSA-Cu NFs + free HRP, and  $\text{Cu}_3(\text{PO}_4)_2$  precipitates + free HRP in the presence and absence of a) GSH, b) Cys, and c) Hcy.

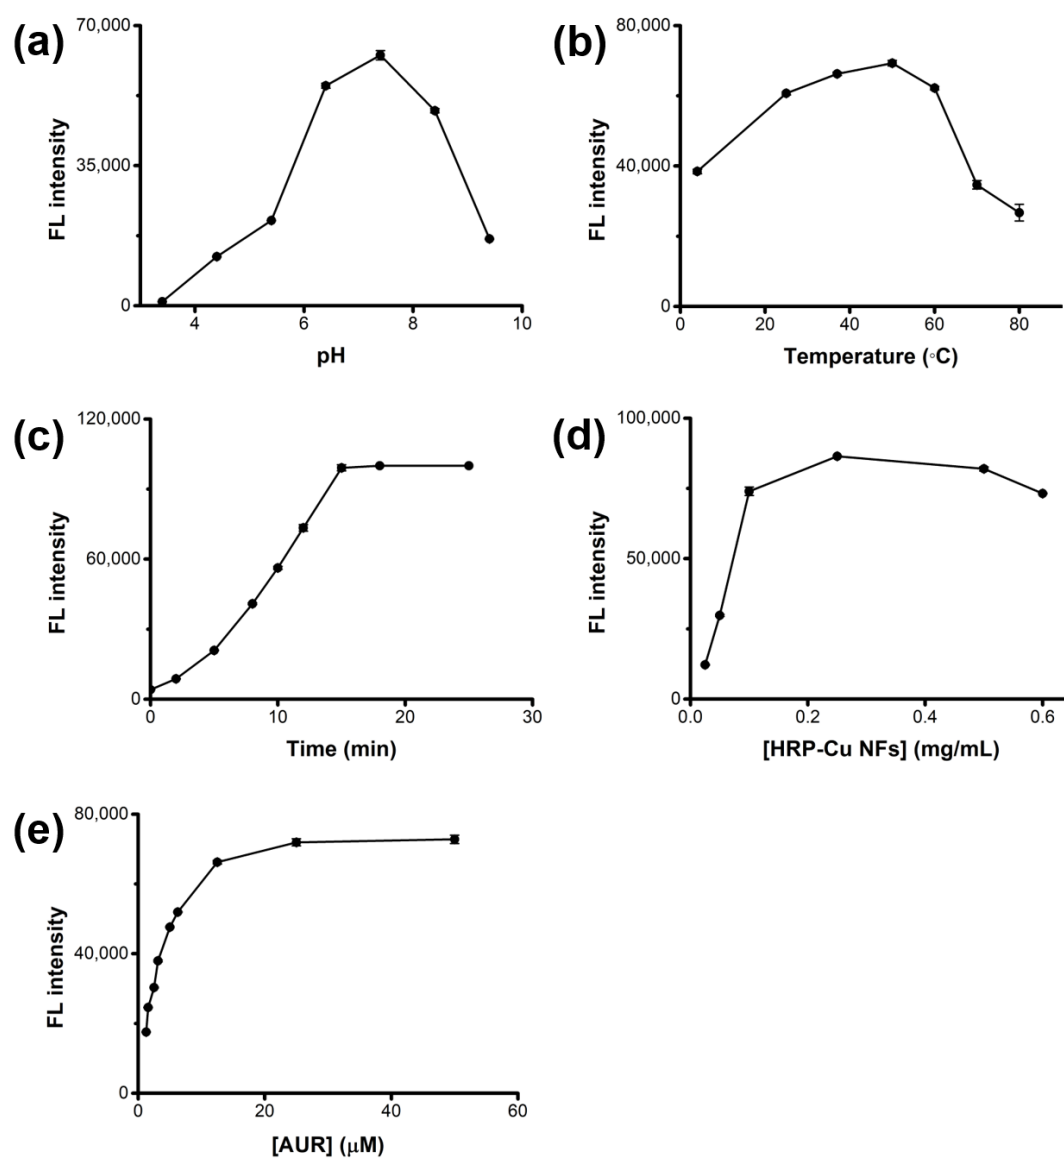

**Figure S6.** Effects of different reaction conditions on GSH detecting activity of HRP-Cu NFs. a) pH, b) temperature, c) reaction time, and the concentrations of d) HRP-Cu NFs and e) AUR.

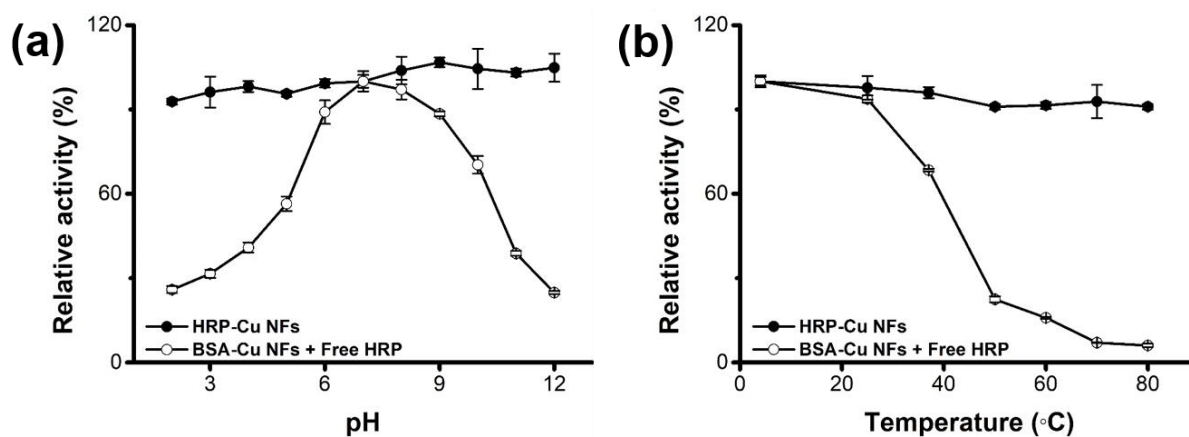

**Figure S7.** Comparison of a) pH and b) thermal stabilities between HRP-Cu NFs and control system comprising BSA-Cu NFs with free HRP.

**Table S1.** Comparison of the analytical sensitivities of HRP-Cu NFs-based assay for the determination of GSH, Cys, and Hcy with those of recent reports.

|     | Method             | Linear range ( $\mu\text{M}$ ) | LOD ( $\mu\text{M}$ ) | Reference     |
|-----|--------------------|--------------------------------|-----------------------|---------------|
| GSH | Cyclic voltammetry | $0.3 - 3.5 \times 10^3$        | 0.300                 | [1]           |
|     | Amperometry        | $857 - 4.1 \times 10^3$        | 5.000                 | [2]           |
|     | Colorimetry        | 1 - 25                         | 0.300                 | [3]           |
|     | Fluorometry        | 0.1 - 20                       | 0.032                 | [4]           |
|     | Fluorometry        | 1 - 10                         | 0.300                 | [5]           |
|     | Fluorometry        | 0.1 - 1.0                      | $13.4 \times 10^{-3}$ | Present study |
| Cys | Amperometry        | 5 - 60                         | 1.5                   | [6]           |
|     | Amperometry        | $5 - 12.6 \times 10^3$         | 3.64                  | [7]           |
|     | Colorimetry        | 0.05 - 10                      | 0.1                   | [8]           |
|     | Colorimetry        | 1.5 - 6                        | 0.05                  | [9]           |
|     | Fluorometry        | 0.1 - 100                      | 0.08                  | [10]          |
|     | Fluorometry        | 1.0 - 110                      | 0.16                  | [11]          |
|     | Fluorometry        | 0.1 - 1.0                      | $4.5 \times 10^{-3}$  | Present study |
| Hcy | Amperometry        | 10 - 80                        | 6.9                   | [12]          |
|     | Amperometry        | 5 - 200                        | 4.6                   | [13]          |
|     | Colorimetry        | 0.5 - 3.0                      | 0.5                   | [14]          |
|     | Fluorometry        | 0 - 25                         | 1.88                  | [15]          |
|     | Fluorometry        | 0.1 - 1.0                      | $18.3 \times 10^{-3}$ | Present study |

**Table S2.** Determination of GSH in spiked human serum at different dilution factors using HRP-Cu NFs-based assay system.

| Dilution factor | Original biothiols ( $\mu\text{M}$ ) | Added ( $\mu\text{M}$ ) | Expected ( $\mu\text{M}$ ) | Measured ( $\mu\text{M}$ ) | Recovery (%) | CV (%) |
|-----------------|--------------------------------------|-------------------------|----------------------------|----------------------------|--------------|--------|
| 1000            | 0.404                                | 0                       | 0.404                      | 0.397                      | 98.28        | 3.81   |
|                 |                                      | 0.125                   | 0.529                      | 0.533                      | 100.73       | 2.17   |
|                 |                                      | 0.25                    | 0.654                      | 0.639                      | 97.78        | 1.24   |
|                 |                                      | 0.5                     | 0.904                      | 0.862                      | 95.35        | 1.27   |
| 500             | 0.872                                | 0                       | 0.872                      | 0.834                      | 95.61        | 2.00   |
|                 |                                      | 0.125                   | 0.997                      | 0.913                      | 91.61        | 0.29   |
|                 |                                      | 0.25                    | 1.122                      | 0.938                      | 83.1         | 1.84   |
|                 |                                      | 0.5                     | 1.372                      | 1.116                      | 81.33        | 5.10   |

## References

- Narang, J.; Chauhan, N.; Jain, P.; Pundir, C. S. Silver nanoparticles/multiwalled carbon nanotube/polyaniline film for amperometric glutathione biosensor. *Int. J. Biol. Macromol.* **2012**, *50*, 672–678.
- Yuan, B.; Zeng, X.; Xu, C.; Liu, L.; Ma, Y.; Zhang, D.; Fan, Y. Electrochemical modification of graphene oxide bearing different types of oxygen functional species for the electro-catalytic oxidation of reduced glutathione. *Sens. Actuator B-Chem.* **2013**, *184*, 15–20.
- Liu, J.; Meng, L.; Fei, Z.; Dyson, P. J.; Jing, X.; Liu, X.  $\text{MnO}_2$  nanosheets as an artificial enzyme to mimic oxidase for rapid and sensitive detection of glutathione. *Biosens. Bioelectron.* **2017**, *90*, 69–74.
- He, L.; Lu, Y.; Gao, X.; Song, P.; Huang, Z.; Liu, S.; Liu, Y. Self-cascade system based on cupric oxide nanoparticles as dual-functional enzyme mimics for ultrasensitive detection of silver ions. *ACS Sustain. Chem. Eng.* **2018**, *6*, 12132–12139.
- Cai, Q.-Y.; Li, J.; Ge, J.; Zhang, L.; Hu, Y.-L.; Li, Z.-H.; Qu, L.-B. A rapid fluorescence “switch-on” assay for glutathione detection by using carbon dots– $\text{MnO}_2$  nanocomposites. *Biosens. Bioelectron.* **2015**, *72*, 31–36.
- Silva, C. d. C. C. e.; Breitzkreitz, M. C.; Santhiago, M.; Corrêa, C. C.; Kubota, L. T. Construction of a new functional platform by grafting poly(4-vinylpyridine) in multi-walled carbon nanotubes for complexing copper ions aiming the amperometric detection of L-cysteine. *Electrochim. Acta* **2012**, *71*, 150–158.
- Geng, D.; Li, M.; Bo, X.; Guo, L. Molybdenum nitride/nitrogen-doped multi-walled carbon nanotubes hybrid nanocomposites as novel electrochemical sensor for detection L-cysteine. *Sens. Actuator B-Chem.* **2016**, *237*, 581–590.
- Lee, J.-S.; Ulmann, P. A.; Han, M. S.; Mirkin, C. A. A DNA–gold nanoparticle-based colorimetric competition assay for the detection of cysteine. *Nano Lett.* **2008**, *8*, 529–533.
- Chen, S.; Gao, H.; Shen, W.; Lu, C.; Yuan, Q. Colorimetric detection of cysteine using noncrosslinking aggregation of fluorosurfactant-capped silver nanoparticles. *Sens. Actuator B-Chem.* **2014**, *190*, 673–678.
- Liu, H.; Sun, Y.; Yanga, J.; Hua, Y.; Yanga, R.; Lia, Z.; Qu, L.; Lin, Y. High performance fluorescence biosensing of cysteine in human serum with superior specificity based on carbon dots and cobalt-derived recognition. *Sens. Actuator B-Chem.* **2019**, *280*, 62–68.
- Dong, W.; Wang, R.; Gong, X.; Liang, W.; Dong, C. A far-red FRET fluorescent probe for ratiometric detection of L-cysteine based on carbon dots and N-acetyl-L-cysteine-capped gold nanoparticles. *Spectrosc. Acta Pt. A-Molec. Biomolec. Spectr.* **2019**, *213*, 90–96.
- Rajaram, R.; Mathiyarasu, J. An electrochemical sensor for homocysteine detection using gold nanoparticle incorporated reduced graphene oxide. *Colloids Surf. B* **2018**, *170*, 109–114.
- Lawrence, N. S.; Deo, R. P.; Wang, J. Detection of homocysteine at carbon nanotube paste electrodes. *Talanta* **2004**, *63*, 443–449.
- McKeague, M.; Foster, A.; Miguel, Y.; Giamberardino, A.; Verdin, C. e.; Chan, J. Y. S.; DeRosa, M. C. Development of a DNA aptamer for direct and selective homocysteine detection in human serum. *RSC Adv.* **2013**, *3*, 24415–24422.

15. Barve, A.; Lowry, M.; Escobedo, J. O.; Thainashmuthu, J.; Strongin, R. M. Fluorescein tri-aldehyde promotes the selective detection of homocysteine. *J. Fluoresc.* **2016**, *26*, 731-737.

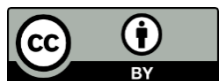

**Copy right:** © 2021 by the authors. Submitted for possible open access publication under the terms and conditions of the Creative Commons Attribution (CC BY) license (<http://creativecommons.org/licenses/by/4.0/>).
